# Supplementary material for: Light-activation of the Archaerhodopsin H+-pump reverses age-dependent loss of vertebrate regeneration: sparking system-level controls in vivo
Source: PubMed Central journal article supplement — Biol Open. 2013 Jan 17;2(3):306–13. doi: 10.1242/bio.20133665 (PMC3603412; doi:10.1242/bio.20133665), 2013-01-17
Supplement: supp_bio.20133665_bio.20133665-s1.pdf [file supp_bio.20133665_bio.20133665-s1.pdf]

**Supplementary Material**

Dany Spencer Adams et al. doi: 10.1242/bio.20133665

**Table S1. Summary of statistical analyses.**

| Experiment               | Measurement                  | N   | Value for dark | Value for light | Test   | Value of statistic | P      |
|--------------------------|------------------------------|-----|----------------|-----------------|--------|--------------------|--------|
| Arch activity            | V <sub>mem</sub>             | 12  | 22±8           | 40±7            | t-test | t=3.541            | 0.002  |
| Arch+YCHE                | Craniofacial abnormalities   | 149 | 6309           | 4866            | MWU    | Z=3.423            | <0.001 |
| Arch+stage 47 amputation | Regenerative ability         | 16  | 45±24          | 111±58          | t-test | t=3.709            | 0.002  |
| Arch+stage 47 amputation | Number of H3P-positive cells | 22  | 4±3            | 12±4            | t-test | t=5.237            | <0.001 |
| <b>No Arch controls</b>  |                              |     |                |                 |        |                    |        |
| No treatment             | V <sub>mem</sub>             | 6   | 29±2           | 29±2            | t-test | t=0.346            | 0.426  |
| YCHE78                   | Craniofacial abnormalities   | 105 | 2665           | 2901            | MWU    | Z=-0.67            | >0.5   |
| Stage 47 amputation      | Regenerative ability         | 14  | 69±44          | 49±30           | t-test | t=1.464            | 0.167  |
